# Supplementary material
Source: publisher figshare collection journal article supplement (https://acs.figshare.com/ndownloader/files/7440628)
Supplement: Supplementary file 1 [file 7440628]

## Supporting Information

### Effects of Concentration and Ionization Degree of Anchoring Cationic Polymers on Lateral Heterogeneity of Anionic Lipid Monolayers

Xiaozheng Duan,<sup>1</sup> Yang Zhang,<sup>2</sup> Liangyi Li,<sup>1</sup> Ran Zhang,<sup>1</sup> Mingming Ding,<sup>\*,1</sup> Qingrong Huang,<sup>3</sup> Wen-Sheng Xu,<sup>\*,4,†</sup> Tongfei Shi<sup>\*,1</sup> and Lijia An<sup>1</sup>

<sup>1</sup> State Key Laboratory of Polymer Physics and Chemistry, Changchun Institute of Applied Chemistry, Chinese Academy of Sciences, Changchun, 130022, P. R. China

<sup>2</sup> Northeast Normal University, Changchun, 130024, P. R. China

<sup>3</sup> Department of Food Science, Rutgers University, 65 Dudley Road, New Brunswick, New Jersey 08901, USA

<sup>4</sup> James Franck Institute, The University of Chicago, Chicago, Illinois 60637, United States

---

\* To whom correspondence should be addressed. Email: mmding@ciac.ac.cn, tfshi@ciac.ac.cn, wsxu0312@gmail.com.

† Current address: Center for Nanophase Materials Sciences, Oak Ridge National Laboratory, Oak Ridge, TN 37831, United States

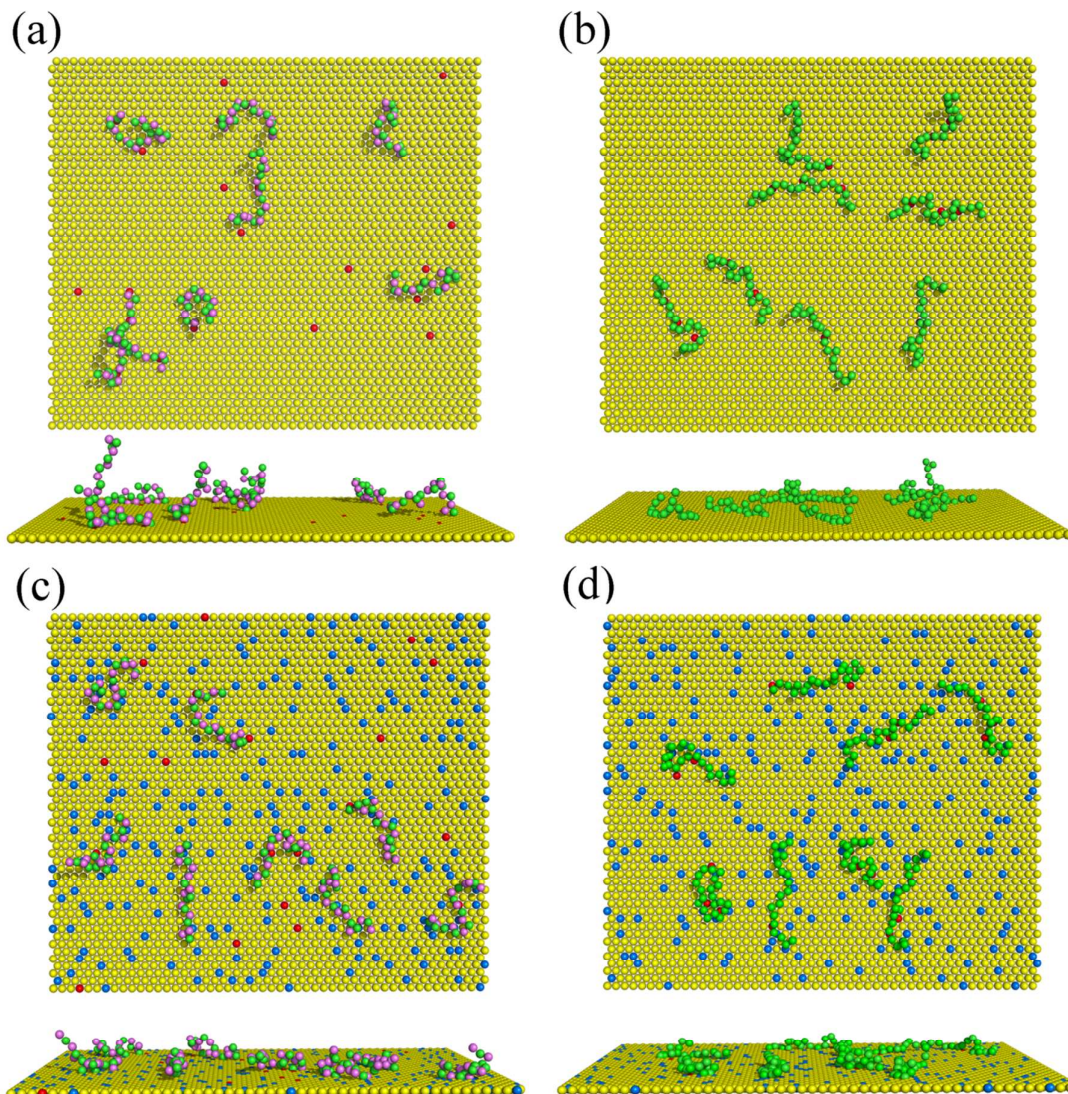

Figure S1. Equilibrated configurations of the polymers/monolayer complexes for the case of  $C_p=0.00185$ . The results are for (a, b) PC:PIP<sub>2</sub>=99:1 and (c, d) PC:PS:PIP<sub>2</sub>=89:10:1. Green and violet spheres denote the cationic and charge-neutral segments of the polymers; red, blue and yellow spheres represent the PIP<sub>2</sub>, PS and PS lipid headgroups. The segmental ionizations ( $f$ ) of the polymers are set as (a, c) 0.5 and (b, d) 1.0, respectively.

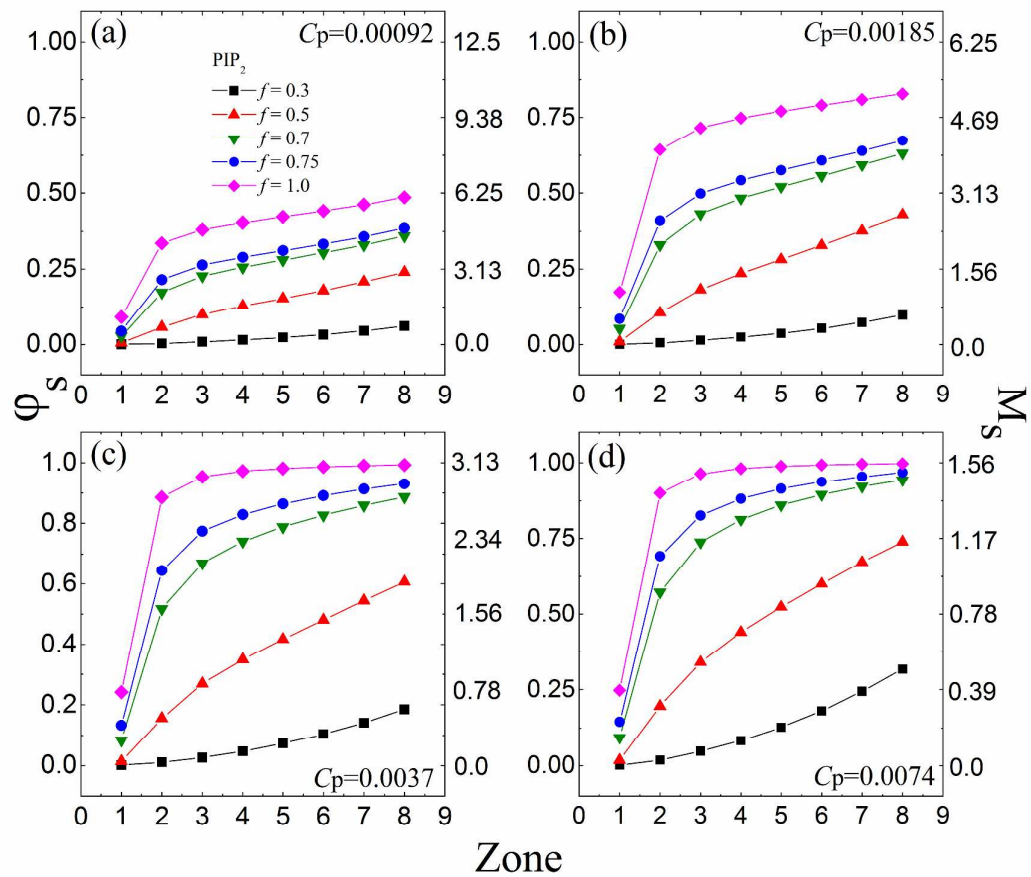

**Figure S2.** Fraction ( $\phi_s$ ) of the total sequestered PIP<sub>2</sub> (solid symbols) and PS (vacant symbols) lipids in the interaction zones of all anchored polymers, and the number ( $M_s$ ) of PIP<sub>2</sub> (solid symbols) and PS (vacant symbols) sequestered in the interaction zones of each anchored polymer. The segmental ionization fraction ( $f$ ) varies from 0.3 to 1.0. The polymer concentration ranges from (a)  $C_p=0.00092$ , (b)  $C_p=0.00185$ , (c)  $C_p=0.0037$  to (d)  $C_p=0.0074$ . The results shown are for PC:PIP<sub>2</sub>=99:1.

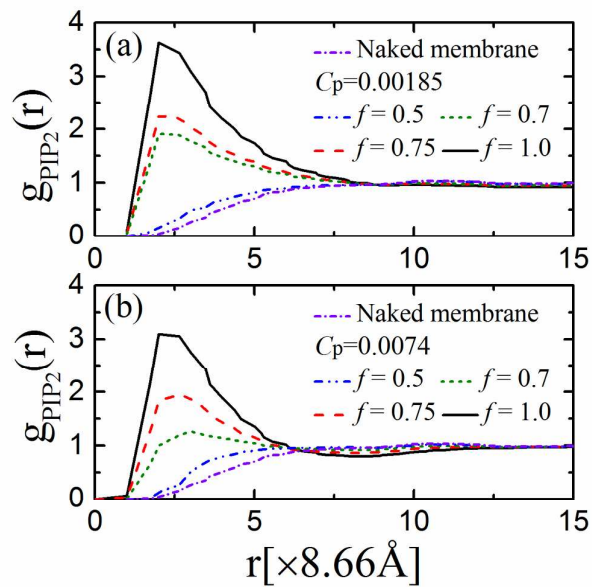

**Figure S3. Radial distribution functions of the PIP<sub>2</sub> lipids. The segmental ionization fraction ( $f$ ) varies from 0.5 to 1.0, and the polymer concentration ranges from  $C_p=0.00185$  to  $C_p=0.0074$ . The results shown are for PC:PIP<sub>2</sub>=99:1.**

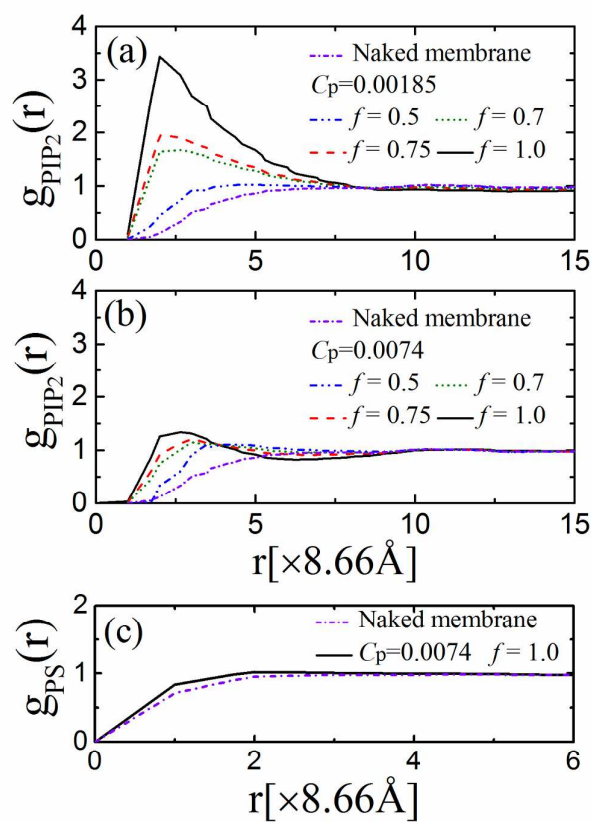

**Figure S4. Radial distribution functions of the  $\text{PIP}_2$  and PS lipids. The segmental ionization fraction ( $f$ ) varies from 0.5 to 1.0, and the polymer concentration ranges from  $C_p=0.00185$  to  $C_p=0.0074$ . The results shown are for PC:PS: $\text{PIP}_2$ =89:10:1.**

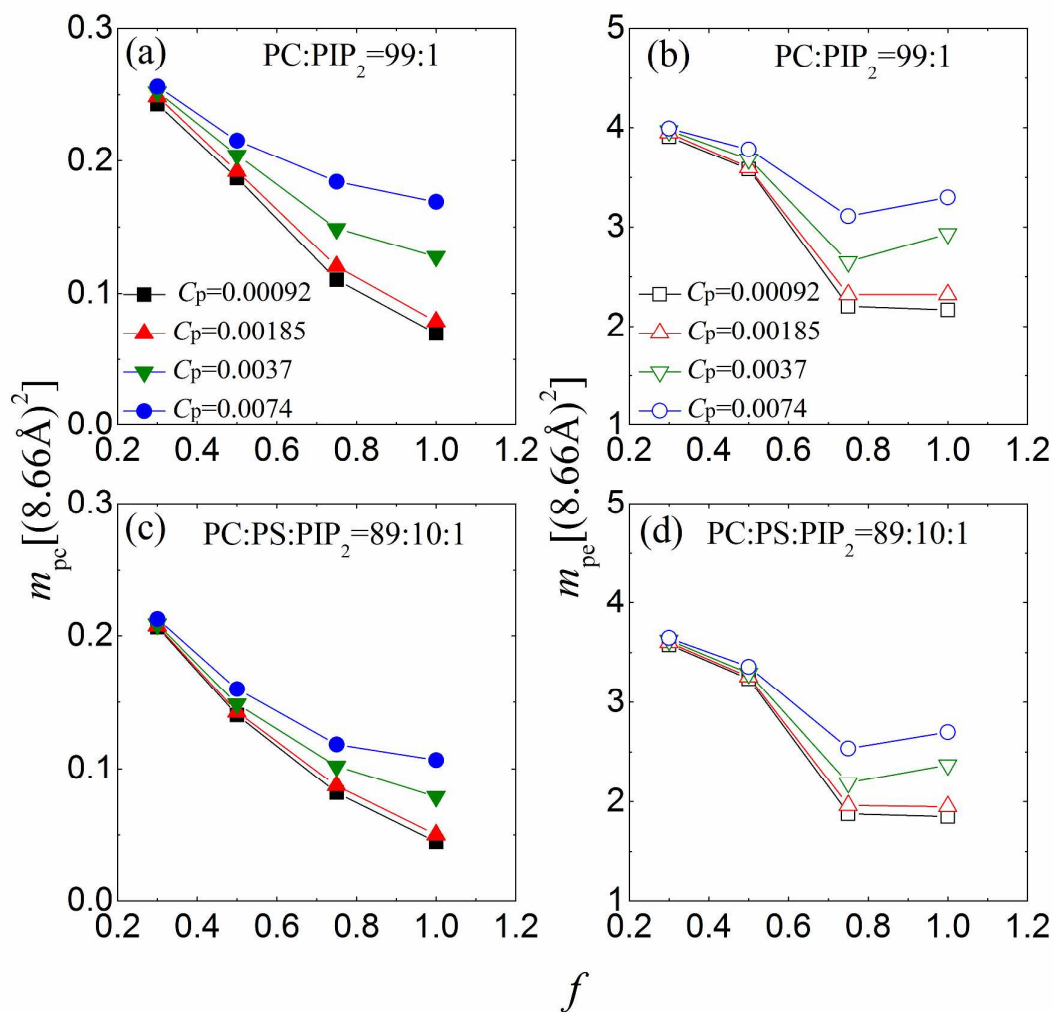

**Figure S5.** MSD of (a, c) the center of mass ( $m_{pc}$ ) and (b, d) the ends ( $m_{pe}$ ) of the anchored polymers in each 50 MC steps. The segmental ionization fraction ( $f$ ) varies from 0.3 to 1.0, and the polymer concentration ( $C_p$ ) ranges from  $C_p=0.00092$  to  $C_p=0.0074$ . The results shown are for (a, b) PC:PIP<sub>2</sub>=99:1 and (c and d) PC:PS:PIP<sub>2</sub>=89:10:1.



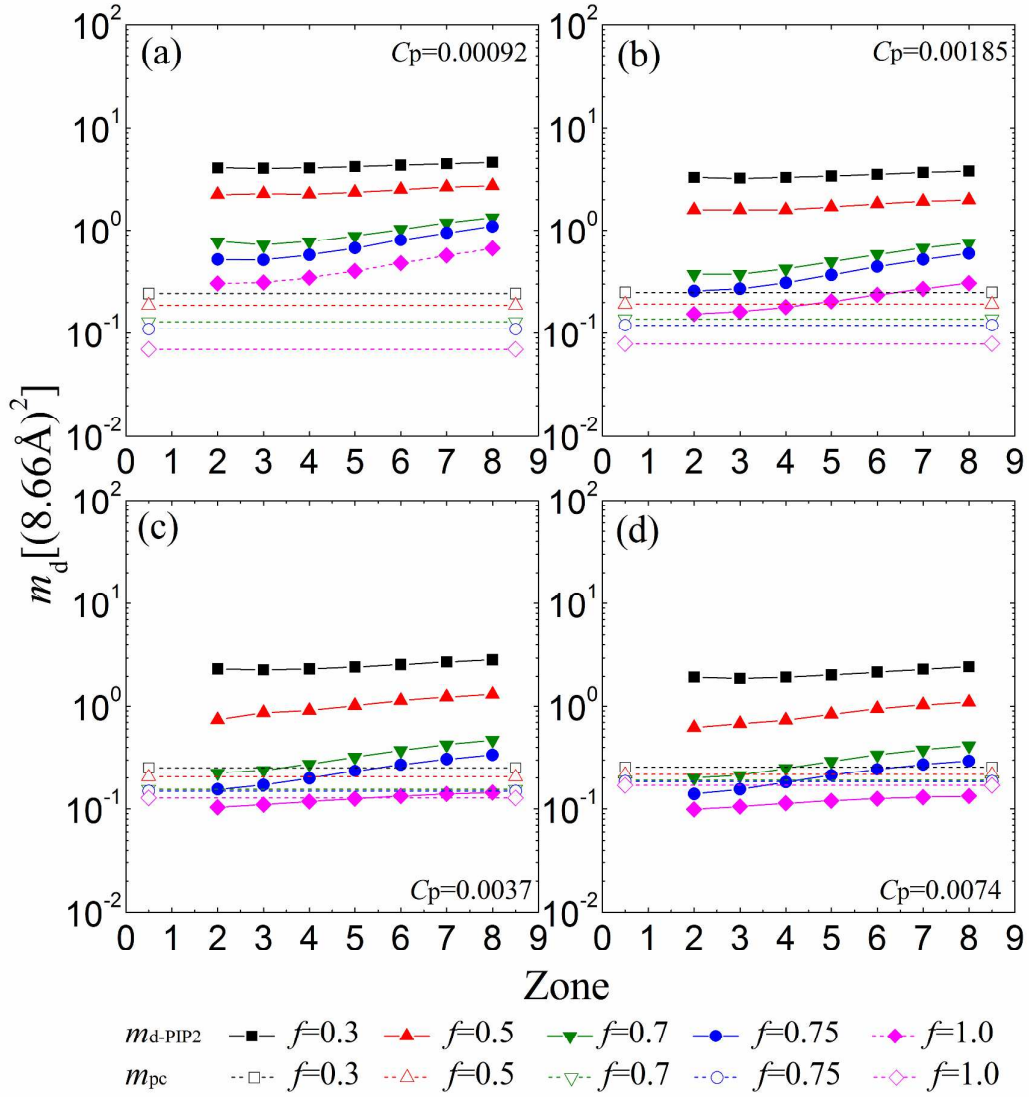

**Figure S6.** MSD of the center of mass of the sequestered PIP<sub>2</sub> micro-domains ( $m_{d-PIP_2}$ , the solid symbols and solid lines), and MSD of the center of mass of the anchored polymers ( $m_{pc}$ , the vacant symbols and dashed lines) in each 50 MC steps. The segmental ionization fraction ( $f$ ) varies from 0.3 to 1.0, and the polymer concentration ( $C_p$ ) ranges from (a)  $C_p=0.00092$ , (b)  $C_p=0.00185$ , (c)  $C_p=0.0037$  to (d)  $C_p=0.0074$ . The results shown are for PC:PIP<sub>2</sub>=99:1.

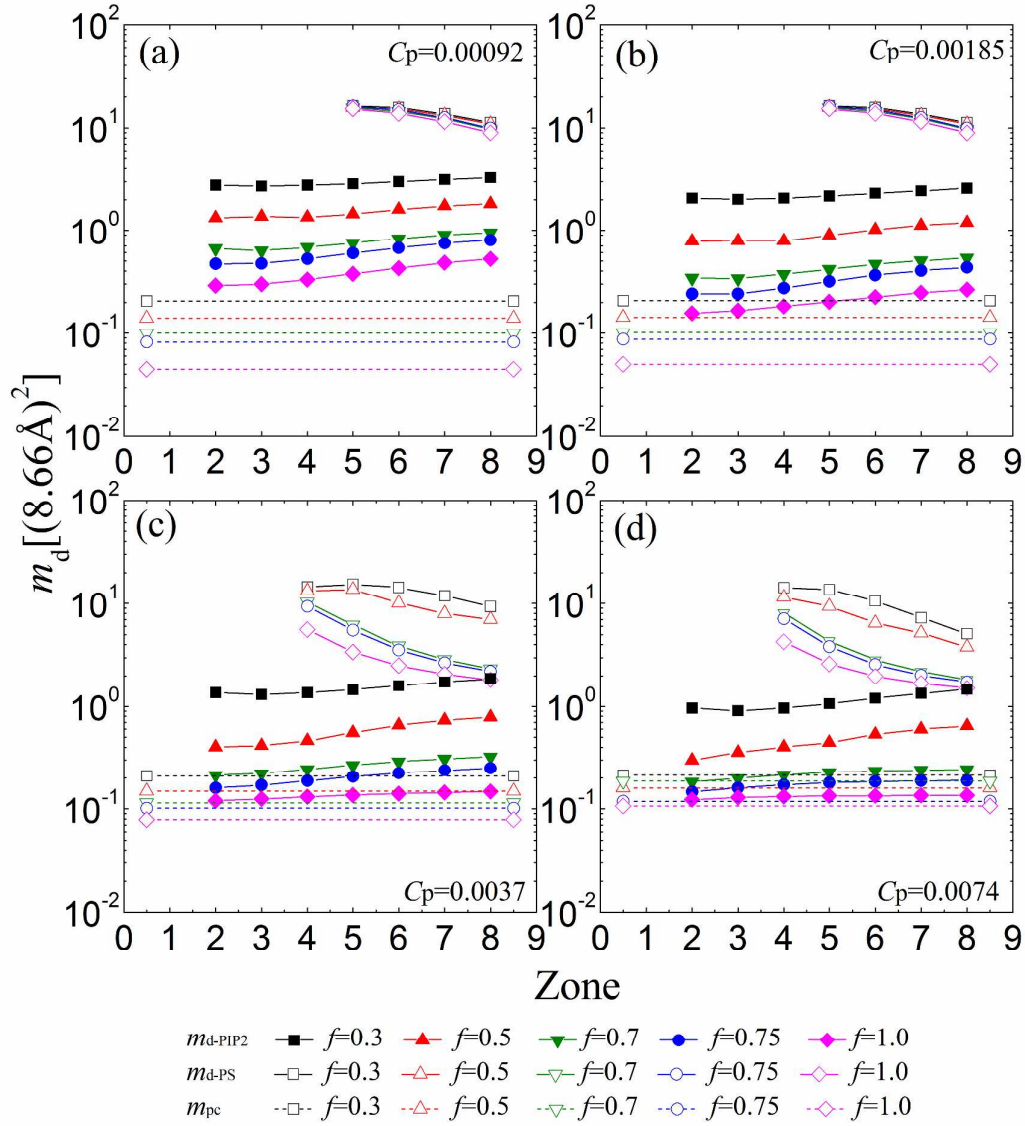

**Figure S7.** MSD of the center of mass of the sequestered PIP<sub>2</sub> micro-domains ( $m_{d-PIP_2}$ , the solid symbols and solid lines) and PS micro-domains ( $m_{d-PS}$ , the vacant symbols and solid lines), and MSD of the center of mass of the anchored polymers ( $m_{pc}$ , the vacant symbols and dashed lines) in each 50 MC steps. The segmental ionization fraction ( $f$ ) varies from 0.3 to 1.0, and the polymer concentration ( $C_p$ ) ranges from (a)  $C_p=0.00092$ , (b)  $C_p=0.00185$ , (c)  $C_p=0.0037$  to (d)  $C_p=0.0074$ . The results shown are for PC:PS:PIP<sub>2</sub>=89:10:1.



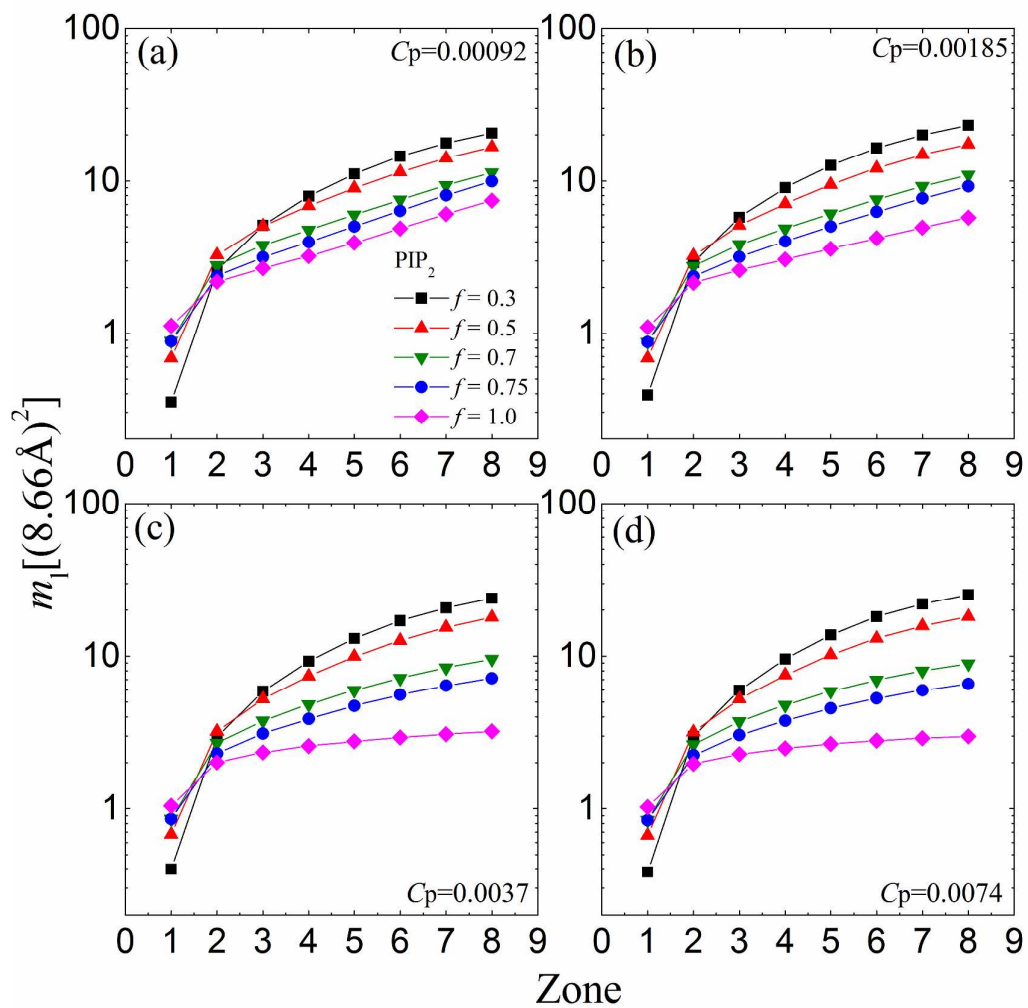

**Figure S8.** MSD of single PIP<sub>2</sub> ( $m_{l-PIP_2}$ , solid symbols and solid lines) sequestered in each interaction zone in each 50 MC steps. The segmental ionization fraction ( $f$ ) varies from 0.3 to 1.0, and the polymer concentration ( $C_p$ ) ranges from (a)  $C_p=0.00092$ , (b)  $C_p=0.00185$ , (c)  $C_p=0.0037$  to (d)  $C_p=0.0074$ . The results shown are for PC:PIP<sub>2</sub>=99:1.

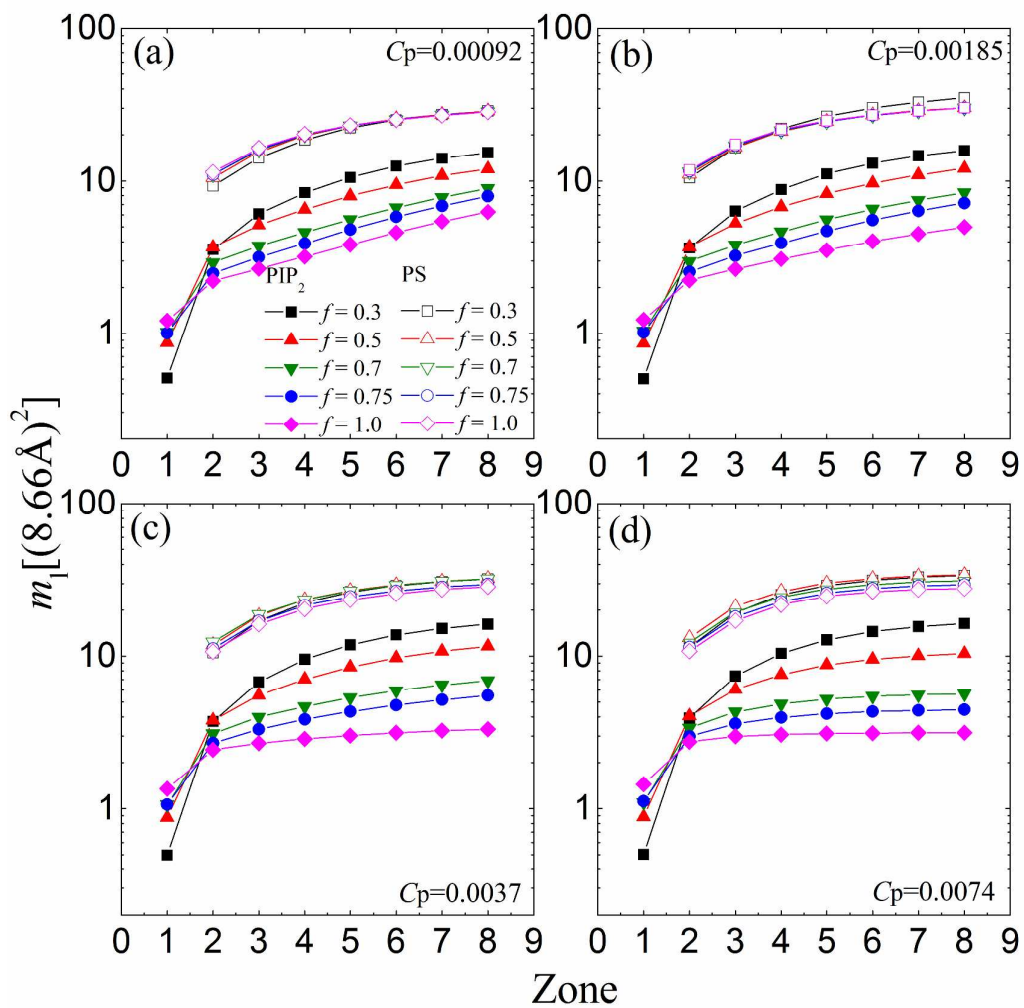

**Figure S9.** MSD of single PIP<sub>2</sub> ( $m_{l-PIP_2}$ , solid symbols and solid lines) and single PS ( $m_{l-PS}$ , vacant symbols and solid lines) sequestered in each interaction zone in each 50 MC steps. The segmental ionization fraction ( $f$ ) varies from 0.3 to 1.0, and the polymer concentration ( $C_p$ ) ranges from (a)  $C_p=0.00092$ , (b)  $C_p=0.00185$ , (c)  $C_p=0.0037$  to (d)  $C_p=0.0074$ . The results shown are for PC:PS:PIP<sub>2</sub>=89:10:1.
